# Supplementary material for: Dielectric barrier discharge-optical emission spectrometry for the simultaneous determination of halogens
Source: Royal Society of Chemistry journal article supplement (doi:10.1039/c5ja00266d), 2015-08-27
Supplement: c5ja00266d1.pdf [file c5ja00266d1.pdf]

## **Dielectric barrier discharge-optical emission spectrometry for the simultaneous determination of halogens**

Deng-Ji Zhang,<sup>a</sup> Yi Cai,<sup>a</sup> Ming-Li Chen,<sup>a</sup> Yong-Liang Yu,<sup>\*ab</sup> and Jian-Hua Wang<sup>\*a</sup>

<sup>a</sup> *Research Center for Analytical Sciences, College of Sciences, Northeastern University, Box 332, Shenyang 110819, China*

<sup>b</sup> *Department of Chemistry, College of Sciences, Northeastern University, Box 332, Shenyang 110819, China*

## Electronic Supplementary Information

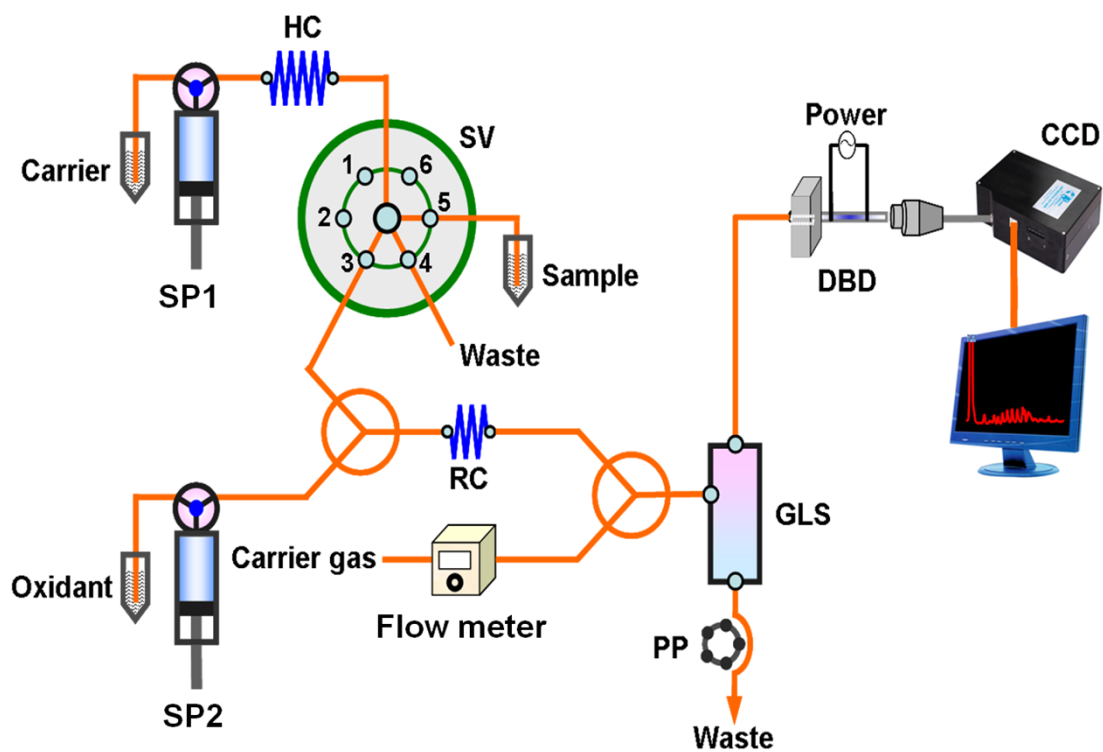

**Figure S1.** Schematic diagram of the DBD-OES system for the simultaneous determination of halides. SP1, SP2: syringe pumps; SV: 6-port selection valve; PP: peristaltic pump; HC: holding coil; RC: reaction coil; GLS: gas-liquid separator.

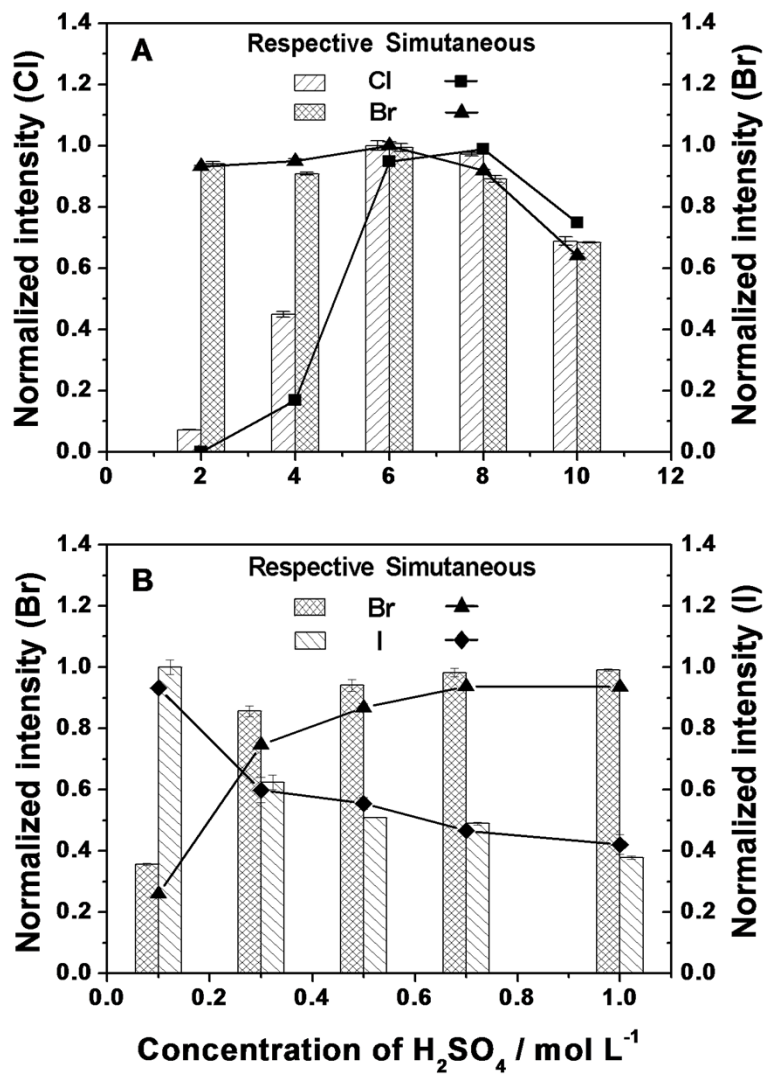

**Figure S2.** The acidity-dependent optical emission intensity for the halogens. (A): Simultaneous and respective determinations of Cl and Br by reaction with 0.1 mol L<sup>-1</sup> KMnO<sub>4</sub>; (B): Simultaneous and respective determinations of Br and I by reaction with 0.02 mol L<sup>-1</sup> KMnO<sub>4</sub>.

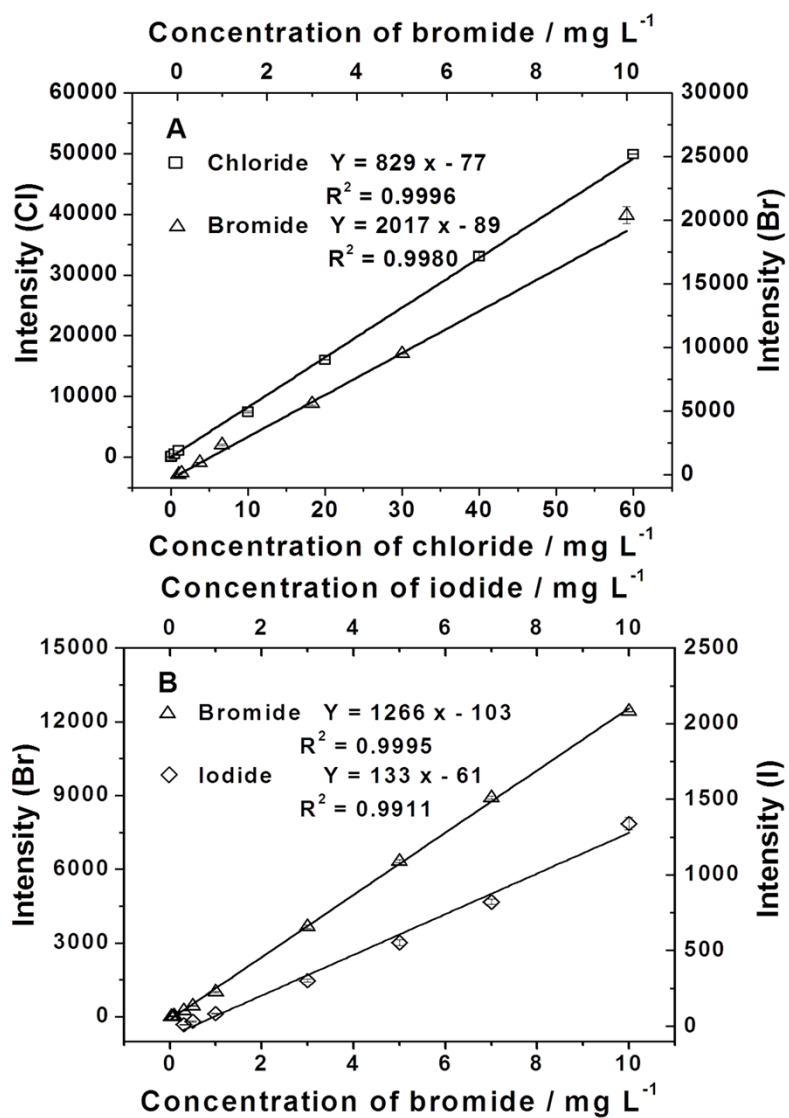

**Figure S3.** The calibration curves of halides obtained by the present system. (A): Simultaneous determination of Cl and Br; (B): Simultaneous determination of Br and I.

**Table S1.** The experimental parameters of the DBD-OES system for the simultaneous determination of halides

| Parameter                                    | Cl and Br<br>Determination | Br and I<br>Determination |
|----------------------------------------------|----------------------------|---------------------------|
| Sample volume                                | 1 mL                       | 1 mL                      |
| Detection wavelength                         | Cl 837 nm; Br 827 nm       | Br 827 nm; I 905 nm       |
| Discharge input voltage                      | 85 V <sub>AC</sub>         | 85 V <sub>AC</sub>        |
| Distance between two electrodes              | 25 mm                      | 25 mm                     |
| Helium flow rate                             | 150 mL min <sup>-1</sup>   | 200 mL min <sup>-1</sup>  |
| Sample loading flow rate                     | 9 mL min <sup>-1</sup>     | 24 mL min <sup>-1</sup>   |
| Reaction time                                | 0 s                        | 15 s                      |
| KMnO <sub>4</sub> concentration              | 0.1 mol L <sup>-1</sup>    | 0.02 mol L <sup>-1</sup>  |
| H <sub>2</sub> SO <sub>4</sub> concentration | 6 mol L <sup>-1</sup>      | 0.5 mol L <sup>-1</sup>   |
